# Supplementary material for: Spanish Validation of the PALMS (Physical Activity and Leisure Motivation Scale)
Source: Int J Environ Res Public Health. 2022 Aug 15;19(16):10064. doi: 10.3390/ijerph191610064 (PMC9408067; doi:10.3390/ijerph191610064)
Supplement: Supplementary file 1 [file ijerph-19-10064-s001.zip › ijerph-1842708-English vesion.pdf]

### PALMS SCALE

| No. | ITEM                                        | SUBSCALE                |
|-----|---------------------------------------------|-------------------------|
| 5   | To get better at an activity                | Mastery                 |
| 16  | To improve existing skills                  | Mastery                 |
| 19  | To do my personal best                      | Mastery                 |
| 24  | To obtain new skills/activities             | Mastery                 |
| 31  | To keep current skill level                 | Mastery                 |
| 3   | Because it is interesting                   | Enjoyment               |
| 13  | Because it makes me happy                   | Enjoyment               |
| 25  | Because it is fun                           | Enjoyment               |
| 34  | Because I enjoy exercising                  | Enjoyment               |
| 37  | Because I have a good time                  | Enjoyment               |
| 4   | Because I enjoy spending time with others   | Affiliation             |
| 8   | To do activity with others                  | Affiliation             |
| 20  | To do something in common with friends      | Affiliation             |
| 30  | To talk with friends exercising             | Affiliation             |
| 38  | To be with friends                          | Affiliation             |
| 6   | Because I perform better than others        | Competition/Ego         |
| 17  | To be best in the group                     | Competition/Ego         |
| 27  | To work harder than others                  | Competition/Ego         |
| 29  | To compete with others around me            | Competition/Ego         |
| 39  | To be fitter than others                    | Competition/Ego         |
| 1   | To earn a living                            | Others' expectations    |
| 7   | Because I get paid to do it                 | Others' expectations    |
| 18  | To manage medical condition                 | Others' expectations    |
| 21  | Because people tell me I need to            | Others' expectations    |
| 26  | Because it was prescribed by doctor, physio | Others' expectations    |
| 10  | Because it helps maintain a healthy body    | Physical condition      |
| 12  | Be physically fit                           | Physical condition      |
| 15  | To maintain physical health                 | Physical condition      |
| 28  | Because it keeps me healthy                 | Physical condition      |
| 33  | To improve cardiovascular fitness           | Physical condition      |
| 2   | Because it helps me relax                   | Psychological condition |
| 9   | To better cope with stress                  | Psychological condition |
| 14  | To get away from pressures                  | Psychological condition |
| 22  | Because it acts as a stress release         | Psychological condition |
| 35  | To take mind off other things               | Psychological condition |
| 11  | To define muscle, look better               | Appearance              |
| 23  | To improve body shape                       | Appearance              |
| 32  | To improve appearance                       | Appearance              |
| 36  | To lose weight, look better                 | Appearance              |
| 40  | To maintain trim, toned body                | Appearance              |
