# Supplementary material for: Spanish Validation of the PALMS (Physical Activity and Leisure Motivation Scale)
Source: Int J Environ Res Public Health. 2022 Aug 15;19(16):10064. doi: 10.3390/ijerph191610064 (PMC9408067; doi:10.3390/ijerph191610064)
Supplement: Supplementary file 1 [file ijerph-19-10064-s001.zip › ijerph-1842708-SI.pdf]

## ESCALA DE MOTIVACIÓN PARA LA PRÁCTICA DE ACTIVIDAD FÍSICA Y OCIO (PALMS)

Al responder a las siguientes afirmaciones, piense en los motivos que tiene para la actividad / deporte que practica.

Trate de no perder tiempo reflexionando sobre sus respuestas. Debe ser una respuesta espontánea.

No existen respuestas correctas o incorrectas. Indique cuánto se corresponden sus motivos con cada uno de los enunciados. En cada caso, 1 indica muy en desacuerdo y 5 indica muy de acuerdo. Por favor, marque el número que mejor represente su respuesta.

| Realizo actividad física....                   | Muy en desacuerdo | En<br>desacuerdo | Indeciso | De acuerdo | Muy de<br>acuerdo |
|------------------------------------------------|-------------------|------------------|----------|------------|-------------------|
| 1-Para ganarme la vida                         |                   |                  |          |            |                   |
| 2- Porque me ayuda a relajarme                 |                   |                  |          |            |                   |
| 3-Porque es interesante                        |                   |                  |          |            |                   |
| 4-Porque disfruto pasando tiempo con los demás |                   |                  |          |            |                   |
| 5-Para mejorar en una actividad                |                   |                  |          |            |                   |
| 6-Porque me desenvuelvo mejor que los demás    |                   |                  |          |            |                   |
| 7-Porque me pagan por hacerlo                  |                   |                  |          |            |                   |
| 8- Para hacer actividad con otras personas     |                   |                  |          |            |                   |
| 9-Para afrontar mejor el estrés                |                   |                  |          |            |                   |
| 10-Porque ayuda a mantener un cuerpo sano      |                   |                  |          |            |                   |
| 11-Para definir el musculo, lucir mejor        |                   |                  |          |            |                   |
| 12-Estar en buena forma física                 |                   |                  |          |            |                   |
| 13-Porque me hace feliz                        |                   |                  |          |            |                   |
| 14- Para alejarme de las presiones             |                   |                  |          |            |                   |
| 15- Para mantener la salud física              |                   |                  |          |            |                   |
| 16- Para mejorar las habilidades existentes    |                   |                  |          |            |                   |
| 17- Para ser el mejor en el grupo              |                   |                  |          |            |                   |
| 18- Para controlar alguna patología médica     |                   |                  |          |            |                   |
| 19- Para hacer mi mejor esfuerzo personal      |                   |                  |          |            |                   |
| 20- Para hacer algo en común con amigos        |                   |                  |          |            |                   |
| 21- Porque la gente me dice que lo necesito    |                   |                  |          |            |                   |

|                                                               |  |  |  |  |  |
|---------------------------------------------------------------|--|--|--|--|--|
| 22- Porque actúa como un liberador de estrés                  |  |  |  |  |  |
| 23- Para mejorar la forma del cuerpo                          |  |  |  |  |  |
| 24- Obtener nuevas habilidades / actividades                  |  |  |  |  |  |
| 25- Porque es divertido                                       |  |  |  |  |  |
| 26- Porque fue prescrito por médico/ fisioterapeuta           |  |  |  |  |  |
| 27- Para trabajar más duro que los demás                      |  |  |  |  |  |
| 28- Porque me mantiene saludable                              |  |  |  |  |  |
| 29- Por competir con los que me rodean                        |  |  |  |  |  |
| 30- Para hablar con amigos haciendo ejercicio                 |  |  |  |  |  |
| 31- Para mantener el nivel de habilidad que tengo actualmente |  |  |  |  |  |
| 32- Para mejorar la apariencia                                |  |  |  |  |  |
| 33- Para mejorar la aptitud cardiovascular                    |  |  |  |  |  |
| 34- Porque disfruto haciendo ejercicio                        |  |  |  |  |  |
| 35- Para dejar de pensar en otras cosas                       |  |  |  |  |  |
| 36- Para adelgazar, lucir mejor                               |  |  |  |  |  |
| 37- Porque me lo paso bien                                    |  |  |  |  |  |
| 38- Para estar con amigos                                     |  |  |  |  |  |
| 39- Estar más en forma que los demás                          |  |  |  |  |  |
| 40- Para mantener un cuerpo esbelto y tonificado              |  |  |  |  |  |
